# Supplementary figures and images for: Squamous Cell Carcinoma of the Scalp after Artificial Hair Implantation
Source: PubMed Central journal article supplement — Plast Reconstr Surg Glob Open. 2021 Jan 26;9(1):e3375. doi: 10.1097/GOX.0000000000003375 (PMC7862074; doi:10.1097/gox.0000000000003375), 2021-01-26

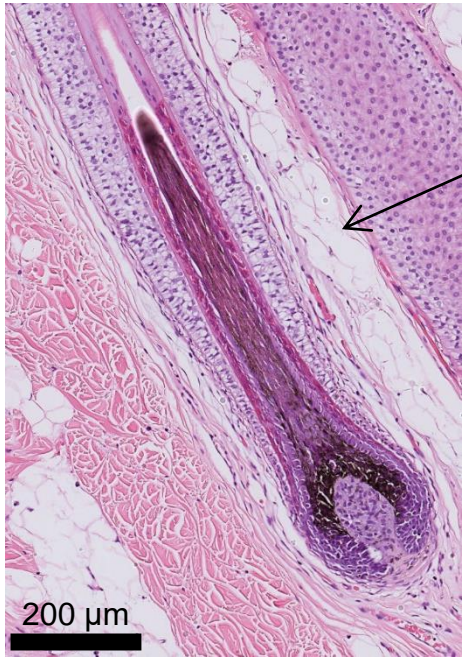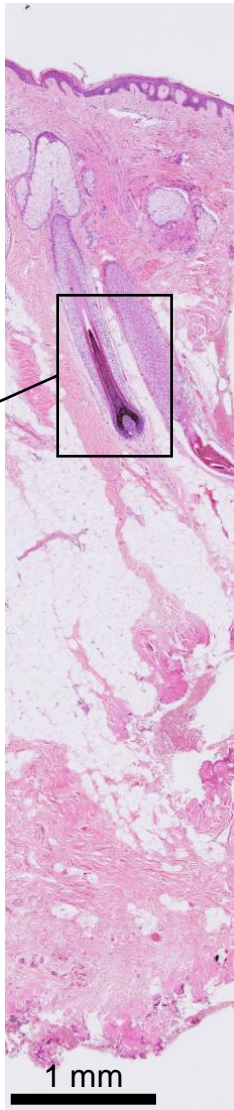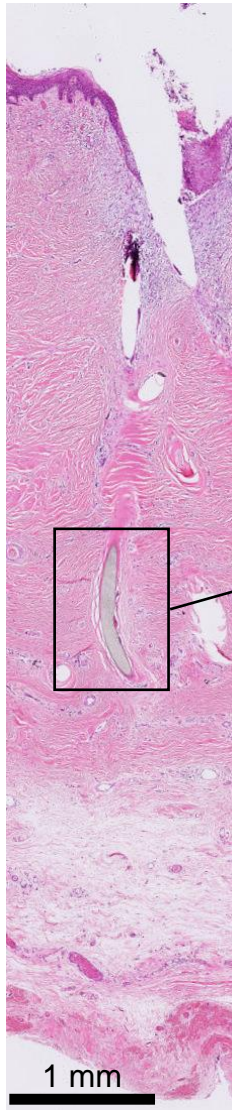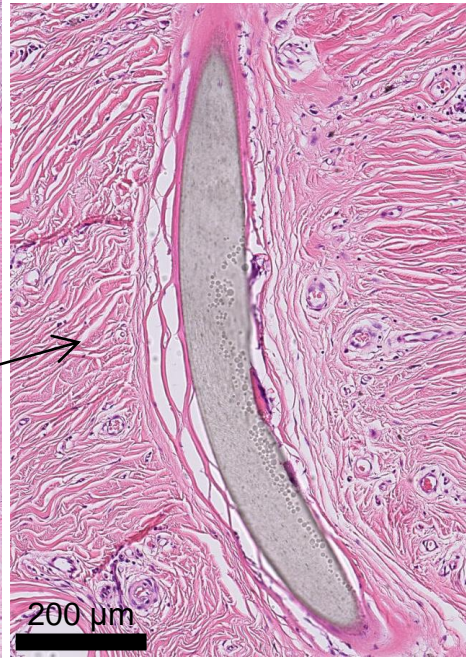

Supplement: gox-9-e3375-s001.pdf [file gox-9-e3375-s001.pdf]

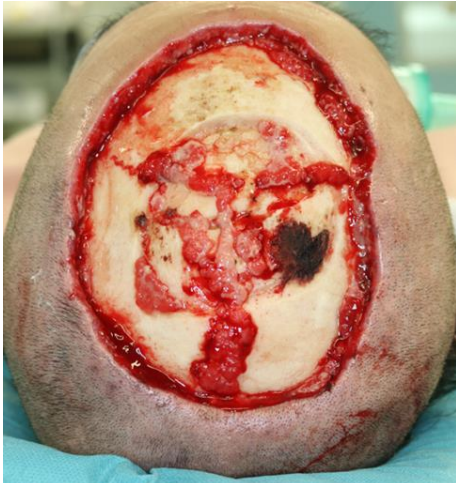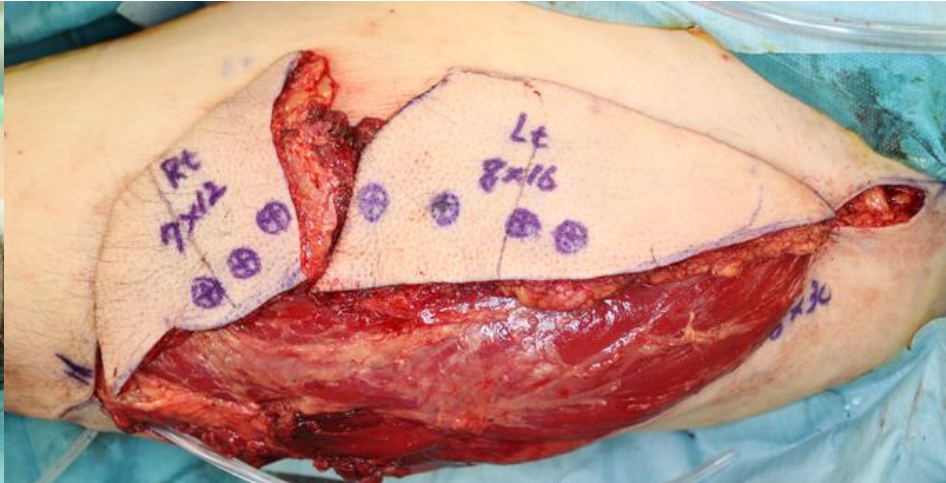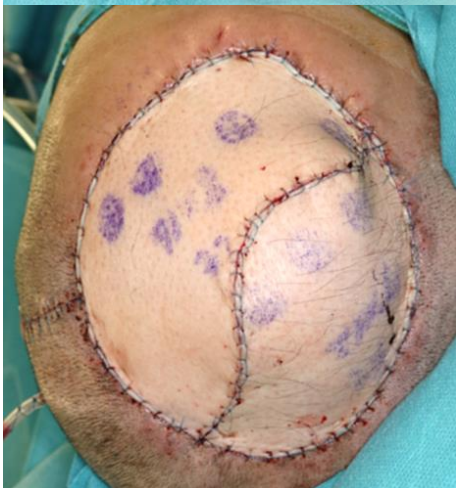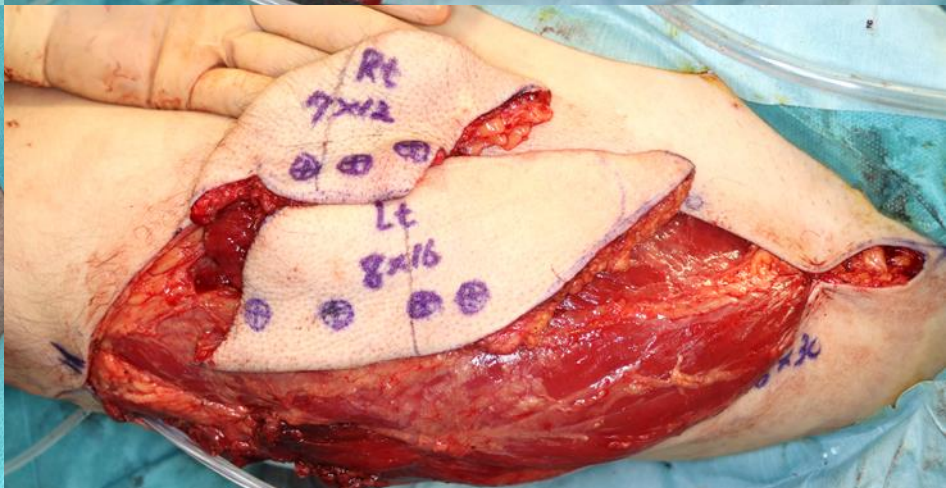

Supplement: gox-9-e3375-s002.pdf [file gox-9-e3375-s002.pdf]
